# Supplementary material
Source: Springer Nature journal article supplement (https://www.springermedizin.de/resource/supplementary/12875_2011_638_MOESM4_ESM.pdf/9434838)
Supplement: MOESM4 [file 9434838]

### Inclusion Criteria

Ages 12 to 24 years (Authors)

Lived in one of the ten provinces in Canada (Authors)

Lived in private dwellings (Statistics Canada)

Health questions answered by respondents (Authors)

### Exclusion Criteria

Lived in one of the territories in Canada (Authors)

Lived on reserves, Crown lands, in institutions, in remote regions (Statistics Canada)

Full-time members of Canadian Armed Forces (Statistics Canada)

Health questions were answered by a proxy (e.g. by a parent) (Authors)

Missing data on outcome or independent variables (excluding income) (Authors)

(Authors) Refers to criteria imposed by the authors for this study

(Statistics Canada) Refers to criteria imposed during the survey administration
